# Supplementary material for: Impacts of spatial heterogeneity of anthropogenic aerosol emissions in a regionally refined global aerosol–climate model
Source: Copernicus journal article supplement (doi:10.5194/gmd-17-3507-2024), 2024-05-02
Supplement: Supplementary file 1 [file gmd-17-3507-2024-supplement.pdf]

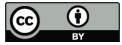

*Supplement of*

## **Impacts of spatial heterogeneity of anthropogenic aerosol emissions in a regionally refined global aerosol–climate model**

**Taufiq Hassan et al.**

*Correspondence to:* Taufiq Hassan (taufiq.hassan@pnnl.gov) and Kai Zhang (kai.zhang@pnnl.gov)

The copyright of individual parts of the supplement might differ from the article licence.

**Contents of this file**

1. **Table S1 and S3**
2. **Figures S1 to S19**

**Table S1.** EAMv2 anthropogenic aerosol emissions data statistics in the default emission treatment for present-day (PD) LR simulations. Statistics are shown for both the surface and elevated emissions of different aerosol species. All estimates are over the North American land (bounded by 15° – 75°N and 50°W – 170°W). Mean values indicate the area-weighted mean emission fluxes. NMB, NStdDevB, and N\_RMSE are defined as  $(\frac{\sum(emis_{lin}-emis_{accurate})}{\sum emis_{accurate}}) \times 100\%$ ,  $\frac{stdDev_{lin}-stdDev_{accurate}}{stdDev_{accurate}}$ ,  $\frac{RMSE}{stdDev_{accurate}} \times 100\%$  respectively. The subscript “accurate” indicates data that preserve spatial heterogeneity and conserve mass. The subscript “lin” indicates linearly interpolated data used in the default treatment. NMB, NStdDevB, RMSE, and N\_RMSE before (after) the slash are estimates for LR-PD (LR-EHR-PD). Units of Mean, StdDev, and RMSE are in kg/m<sup>2</sup>/s. N\_RMSE and NMB are in percentage (%). NStdDevB is unitless.

| Aerosol | Emission space | Mean [ $\times 10^{-12}$<br>kg/m <sup>2</sup> /s]<br>(accurate) | NMB [%]       | StdDev<br>[ $\times 10^{-12}$<br>kg/m <sup>2</sup> /s]<br>(accurate) | NStdDevB      | RMSE<br>[ $\times 10^{-12}$<br>kg/m <sup>2</sup> /s] | N_RMSE [%] |
|---------|----------------|-----------------------------------------------------------------|---------------|----------------------------------------------------------------------|---------------|------------------------------------------------------|------------|
| BC      | surface        | 4.93                                                            | -2.669/-1.847 | 9.5                                                                  | -0.209/0.083  | 4.29/3.6                                             | 45.1/37.8  |
|         | elevated       | 1.53                                                            | -1.01/-25.053 | 10.5                                                                 | -0.102/-0.137 | 3.58/6.52                                            | 34/61.9    |
| POM     | surface        | 17.5                                                            | -3.099/-0.472 | 38.9                                                                 | -0.204/0.1    | 16.6/13.2                                            | 42.7/33.9  |
|         | elevated       | 39.1                                                            | -0.37/-26.966 | 301                                                                  | -0.1/-0.146   | 102/186                                              | 33.7/61.8  |
| SO4     | surface        | 0.67                                                            | -0.138/-0.903 | 1.16                                                                 | -0.140/0.087  | 0.42/0.3                                             | 36.1/26    |
|         | elevated       | 4.91                                                            | -2.194/-0.174 | 15.3                                                                 | -0.276/0.525  | 8.9/11.3                                             | 57.9/73.6  |

**Table S2.** EAMv2 anthropogenic aerosol emissions data statistics in the default emission treatment for present-day (PD) RRM simulations. Statistics are shown for both the surface and elevated emissions of different aerosol species. All estimates are over the South Asian land surface (bounded by 0° – 30°N and 60°E – 120°E). Mean values indicate the area-weighted mean emission fluxes. NMB, NStdDevB, and N\_RMSE are defined as  $(\frac{\sum(emis_{lin}-emis_{accurate})}{\sum emis_{accurate}}) \times 100\%$ ,  $\frac{stdDev_{lin}-stdDev_{accurate}}{stdDev_{accurate}}$ ,  $\frac{RMSE}{stdDev_{accurate}} \times 100\%$  respectively. The subscript “accurate” indicates data that preserve spatial heterogeneity and conserve mass. The subscript “lin” indicates linearly interpolated data used in the default treatment. NMB, NStdDevB, RMSE, and N\_RMSE before (after) the slash are estimates for RRM-PD (RRM-EHR-PD). Units of Mean, StdDev, and RMSE are in kg/m<sup>2</sup>/s. N\_RMSE and NMB are in percentage (%). NStdDevB is unitless.

| Aerosol | Emission space | Mean [ $\times 10^{-12}$<br>kg/m <sup>2</sup> /s]<br>(accurate) | NMB [%]       | StdDev<br>[ $\times 10^{-12}$<br>kg/m <sup>2</sup> /s]<br>(accurate) | NStdDevB      | RMSE<br>[ $\times 10^{-12}$<br>kg/m <sup>2</sup> /s] | N_RMSE [%] |
|---------|----------------|-----------------------------------------------------------------|---------------|----------------------------------------------------------------------|---------------|------------------------------------------------------|------------|
| BC      | surface        | 76.3                                                            | -3.091/ 0.734 | 84.6                                                                 | -0.236/ 0.192 | 42.6/ 30.3                                           | 50.3/ 35.7 |
|         | elevated       | 4.1                                                             | -2.566/ 4.997 | 9.49                                                                 | -0.244/ 0.340 | 4.48/ 4.89                                           | 47.1/ 51.4 |
| POM     | surface        | 286                                                             | -3.088/ 0.769 | 278                                                                  | -0.202/ 0.151 | 120/ 85.8                                            | 43.3/ 30.9 |
|         | elevated       | 59.6                                                            | -2.414/ 2.032 | 177                                                                  | -0.285/ 0.306 | 94.4/ 86                                             | 53.4/ 48.6 |
| SO4     | surface        | 5.56                                                            | -2.927/ 0.671 | 7.38                                                                 | -0.223/ 0.168 | 3.62/ 2.27                                           | 49/ 30.7   |
|         | elevated       | 32.4                                                            | -4.259/ 0.023 | 64.8                                                                 | -0.381/ 0.598 | 43.8/ 57.5                                           | 67.6/ 88.7 |

**Table S3.** EAMv2 simulated source-sink statistics from RRM-SE-PD and RRM-PD simulations. Statistics are based on annual mean estimates for both the total and contributing processes for different aerosol species. All estimates are over the North America land surface. N\_RMSE is defined as in Table 1.

| Aerosol species   | Sources / Sinks | Decomposed process       | Mean<br>[kg m <sup>-2</sup> s <sup>-1</sup> ] | RMSE<br>[kg m <sup>-2</sup> s <sup>-1</sup> ] | N_RMSE<br>[%] |
|-------------------|-----------------|--------------------------|-----------------------------------------------|-----------------------------------------------|---------------|
| BC                | Sources         | Total                    | 0.00002                                       | 0.000046                                      | 71            |
|                   |                 | Surf emis                | 0.000015                                      | 0.000023                                      | 67            |
|                   |                 | Elev emis                | 0.000006                                      | 0.00004                                       | 72            |
|                   | Sinks           | Total                    | -0.000017                                     | 0.000006                                      | 45            |
|                   |                 | Dry dep (Grav)           | 0.0                                           | 0.0                                           | 15            |
|                   |                 | Dry dep (Turb)           | 0.000007                                      | 0.000006                                      | 58            |
|                   |                 | Wet dep (incloud, strat) | -0.000007                                     | 0.0                                           | 13            |
|                   |                 | Wet dep (incloud, conv)  | -0.000003                                     | 0.0                                           | 12            |
|                   |                 | Wet dep (belowcloud)     | -0.0                                          | 0.0                                           | 13            |
|                   |                 | POM                      | Sources                                       | Total                                         | 0.000197      |
|                   |                 | Surf emis                | 0.000052                                      | 0.000084                                      | 62            |
|                   |                 | Elev emis                | 0.000144                                      | 0.001133                                      | 72            |
|                   | Sinks           | Total                    | -0.000131                                     | 0.000029                                      | 34            |
|                   |                 | Dry dep (Grav)           | 0.000003                                      | 0.0                                           | 17            |
|                   |                 | Dry dep (Turb)           | 0.000048                                      | 0.000028                                      | 45            |
|                   |                 | Wet dep (incloud, strat) | -0.000056                                     | 0.000005                                      | 13            |
|                   |                 | Wet dep (incloud, conv)  | -0.000023                                     | 0.000003                                      | 19            |
|                   |                 | Wet dep (belowcloud)     | -0.000001                                     | 0.0                                           | 18            |
|                   |                 | Sulfate                  | Sources                                       | Total                                         | 0.0001        |
| Surf emis         | 0.0             |                          |                                               | 0.0                                           | 54            |
| Elev emis         | 0.000005        |                          |                                               | 0.000014                                      | 85            |
| Gas-aero exchange | 0.000023        |                          |                                               | 0.00001                                       | 32            |
| AQ chem (H2SO4)   | 0.000001        |                          |                                               | 0.000001                                      | 45            |
| AQ chem (SO4)     | 0.00007         |                          |                                               | 0.000017                                      | 25            |
|                   | Sinks           |                          |                                               | Total                                         | -0.000103     |
|                   |                 | Dry dep (Grav)           | 0.000004                                      | 0.000001                                      | 20            |
|                   |                 | Dry dep (Turb)           | 0.000015                                      | 0.000001                                      | 11            |
|                   |                 | Wet dep (incloud, strat) | -0.000067                                     | 0.000005                                      | 11            |
|                   |                 | Wet dep (incloud, conv)  | -0.000017                                     | 0.000002                                      | 10            |
|                   |                 | Wet dep (belowcloud)     | -0.000001                                     | 0.0                                           | 11            |

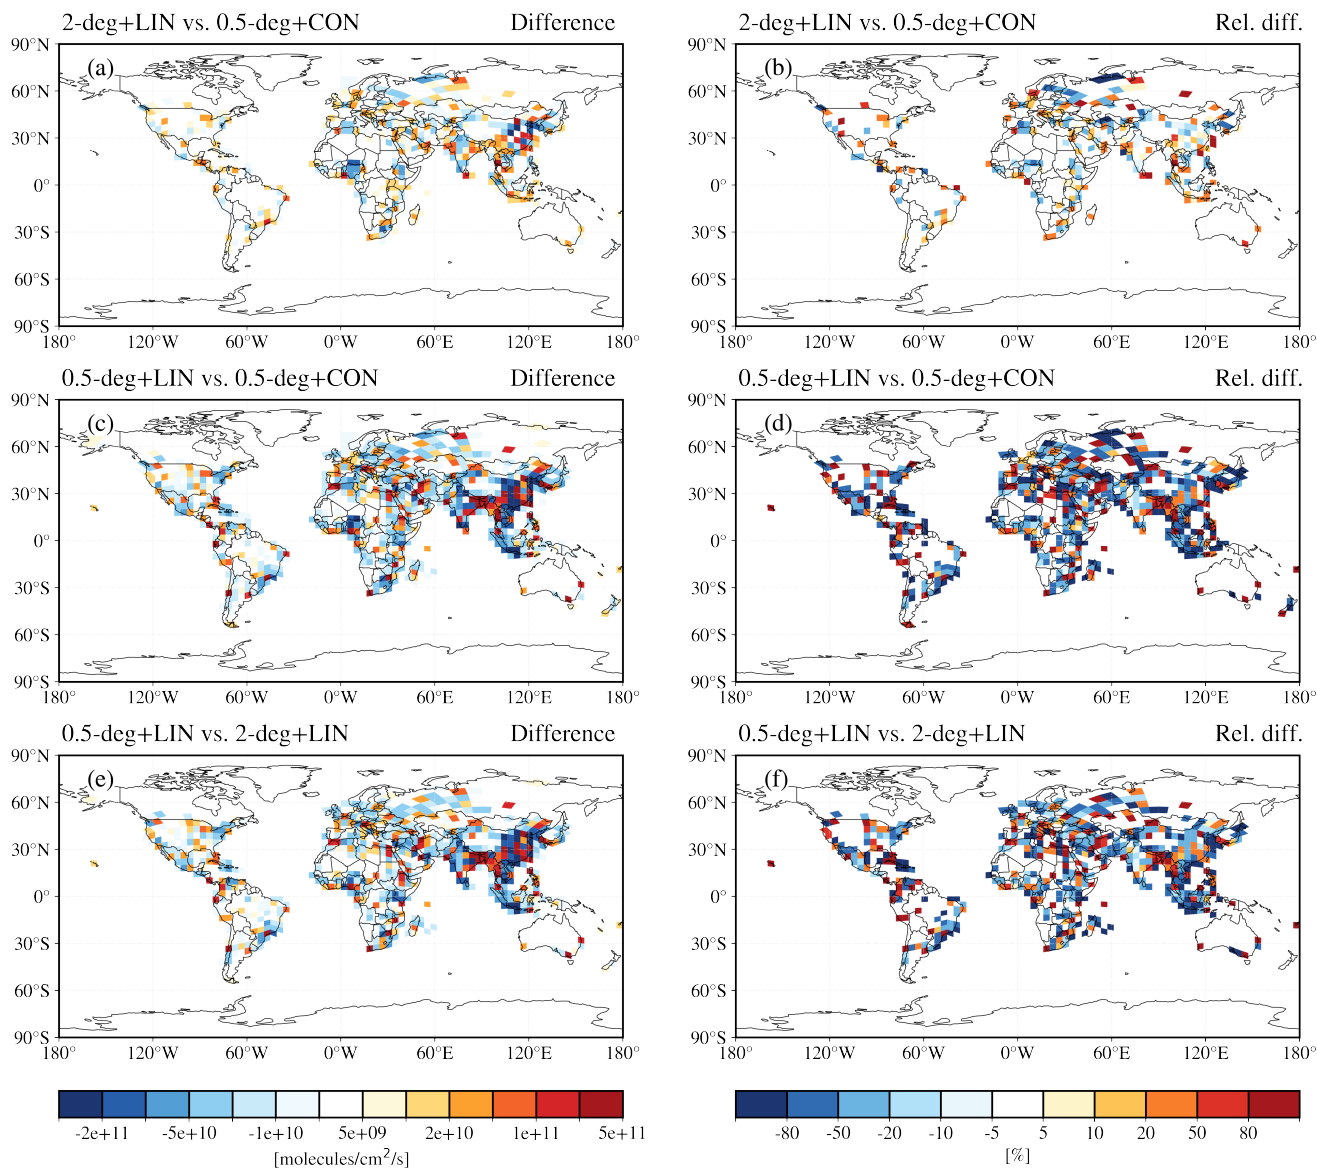

**Figure S1.** Spatial distributions of surface Black Carbon (BC) emission differences among different remapping configurations. Three remapping configurations are exploited, including the conservative remapping of the high-resolution ( $\sim 0.5^\circ$ ) emission data onto the EAM  $\sim 4^\circ$  physical grids (named “0.5-deg+CON”), the non-conservative linear remapping of the  $0.5^\circ$  emission data onto the  $\sim 4^\circ$  grids (named “0.5-deg+LIN”), and the non-conservative linear remapping of the low-resolution ( $\sim 2^\circ$ ) emission data onto the  $\sim 4^\circ$  grids (named “2-deg+LIN”). The first row (a, b) shows the differences between the “2-deg+LIN” and “0.5-deg+CON” remapping configurations, the second row (c, d) is for the differences between the “0.5-deg+LIN” and “0.5-deg+CON” remapping configurations, and the third row (e, f) compares the “0.5-deg+LIN” and “2-deg+LIN” configurations. The emission differences (a, c, e) are shown in the left panels in molecules/cm<sup>2</sup>/s and the relative differences (b, d, f) are shown in the right panels in percent (%).

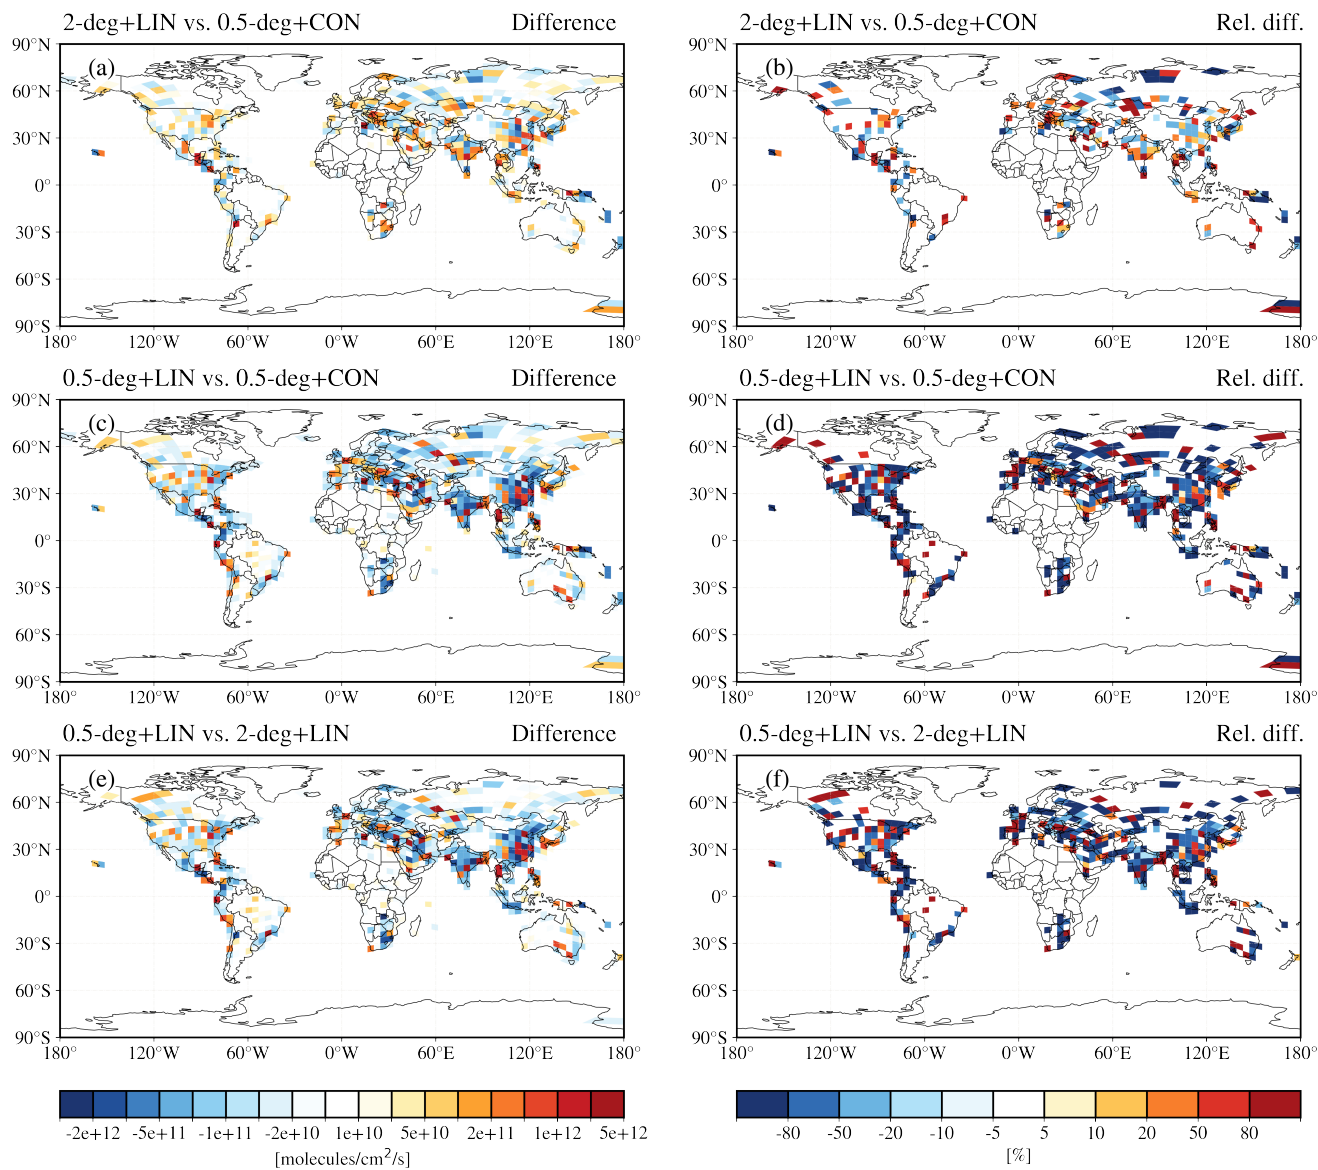

**Figure S2.** Same as Figure S2 but for elevated SO<sub>2</sub> emissions (i.e., energy, industrial, biomass burning, and volcanic sources).

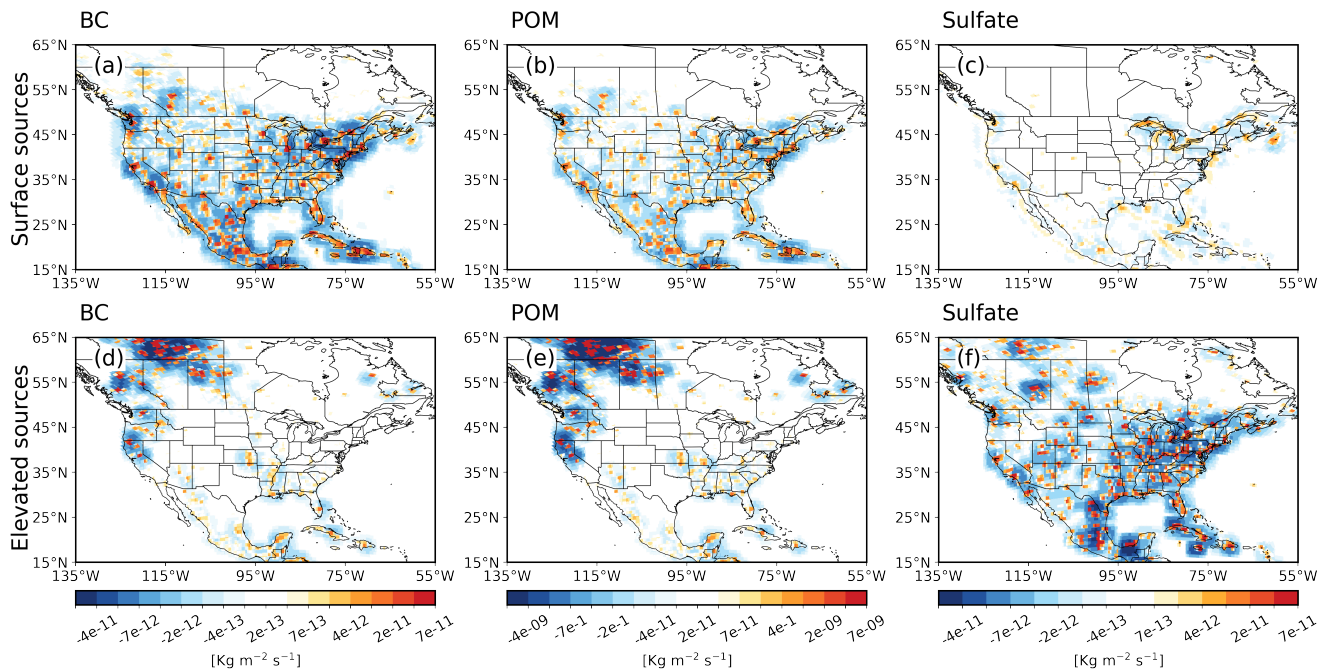

**Figure S3.** Spatial distribution of difference in surface (top) and elevated (bottom) emissions used in RRM-SE-PD and RRM-PD over North America for (a) Black Carbon (BC), (b) Primary Organic Matter (POM), and (c) Sulfate (SO<sub>4</sub>) aerosols. The units are in kg/m<sup>2</sup>/s.



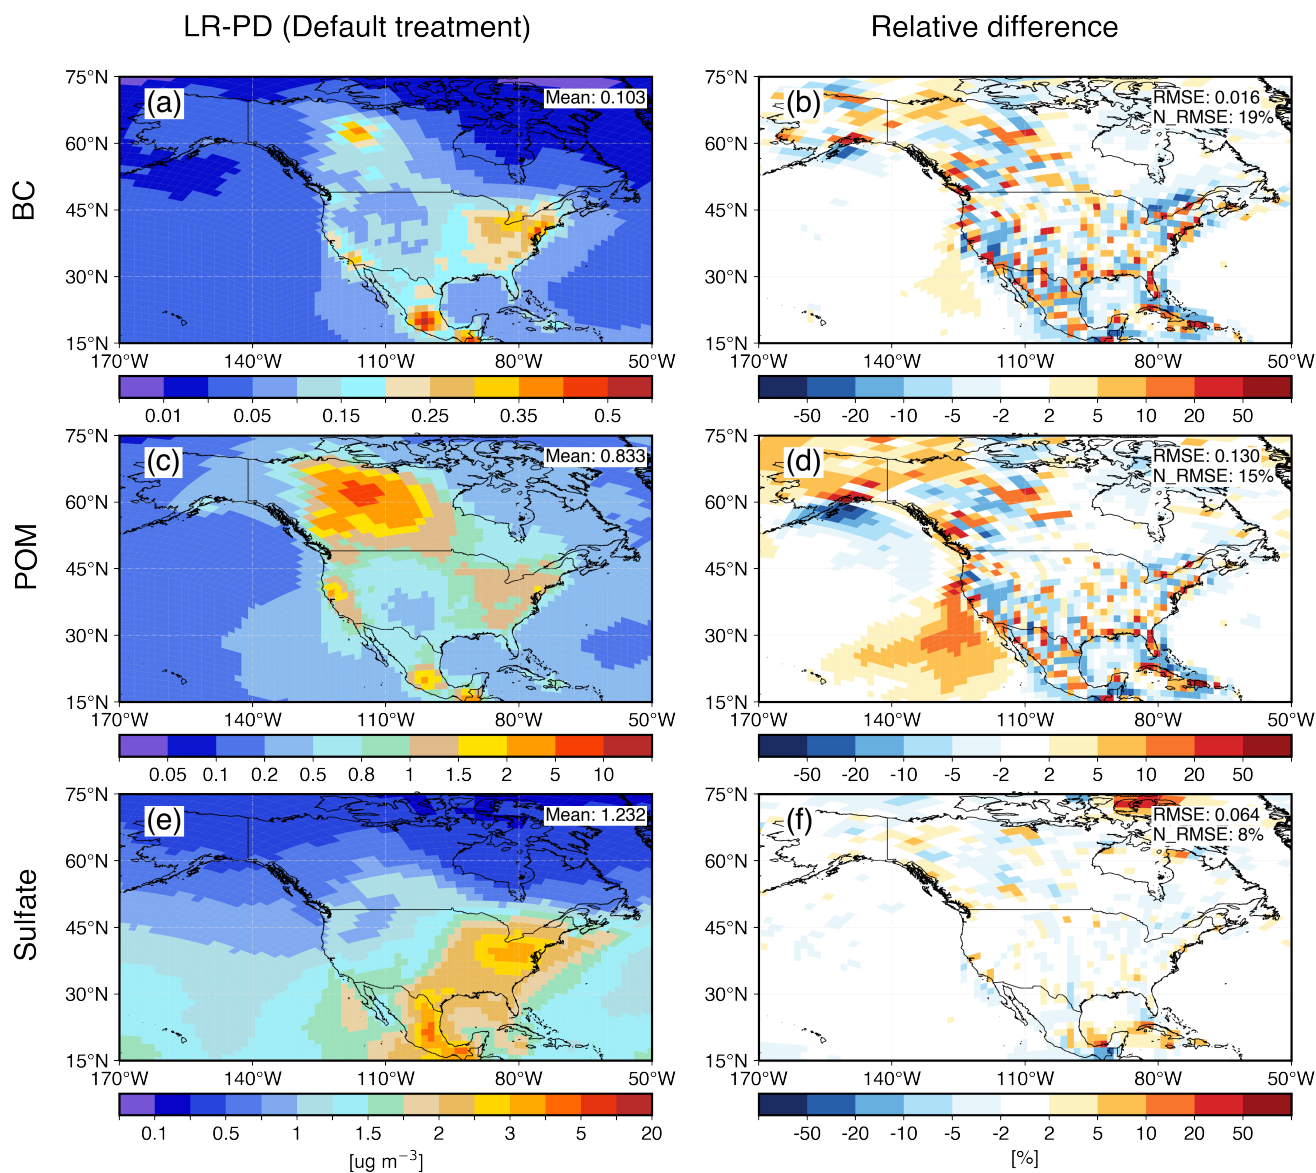

**Figure S4.** Simulated spatial distribution of annual mean aerosol surface concentration from LR-PD (left column) and the relative difference between LR-SE-PD and LR-PD (right column) over North America. Distributions are shown for (a, b) Black Carbon (BC), (c, d) Primary Organic Matter (POM), and (e, f) Sulfate aerosols. The relative difference for field X is calculated as:  $\left(\frac{X_{se} - X_{def}}{X_{def}}\right) \times 100\%$ , where “se” and “def” subscripts refer to the simulations with new and default emission treatment respectively. Mean, RMSE and normalized RMSE (N\_RMSE) are indicated at the top right corner of the panels. Mean and RMSE has a unit of  $\mu\text{g m}^{-3}$ . N\_RMSE is defined as in Table 2.

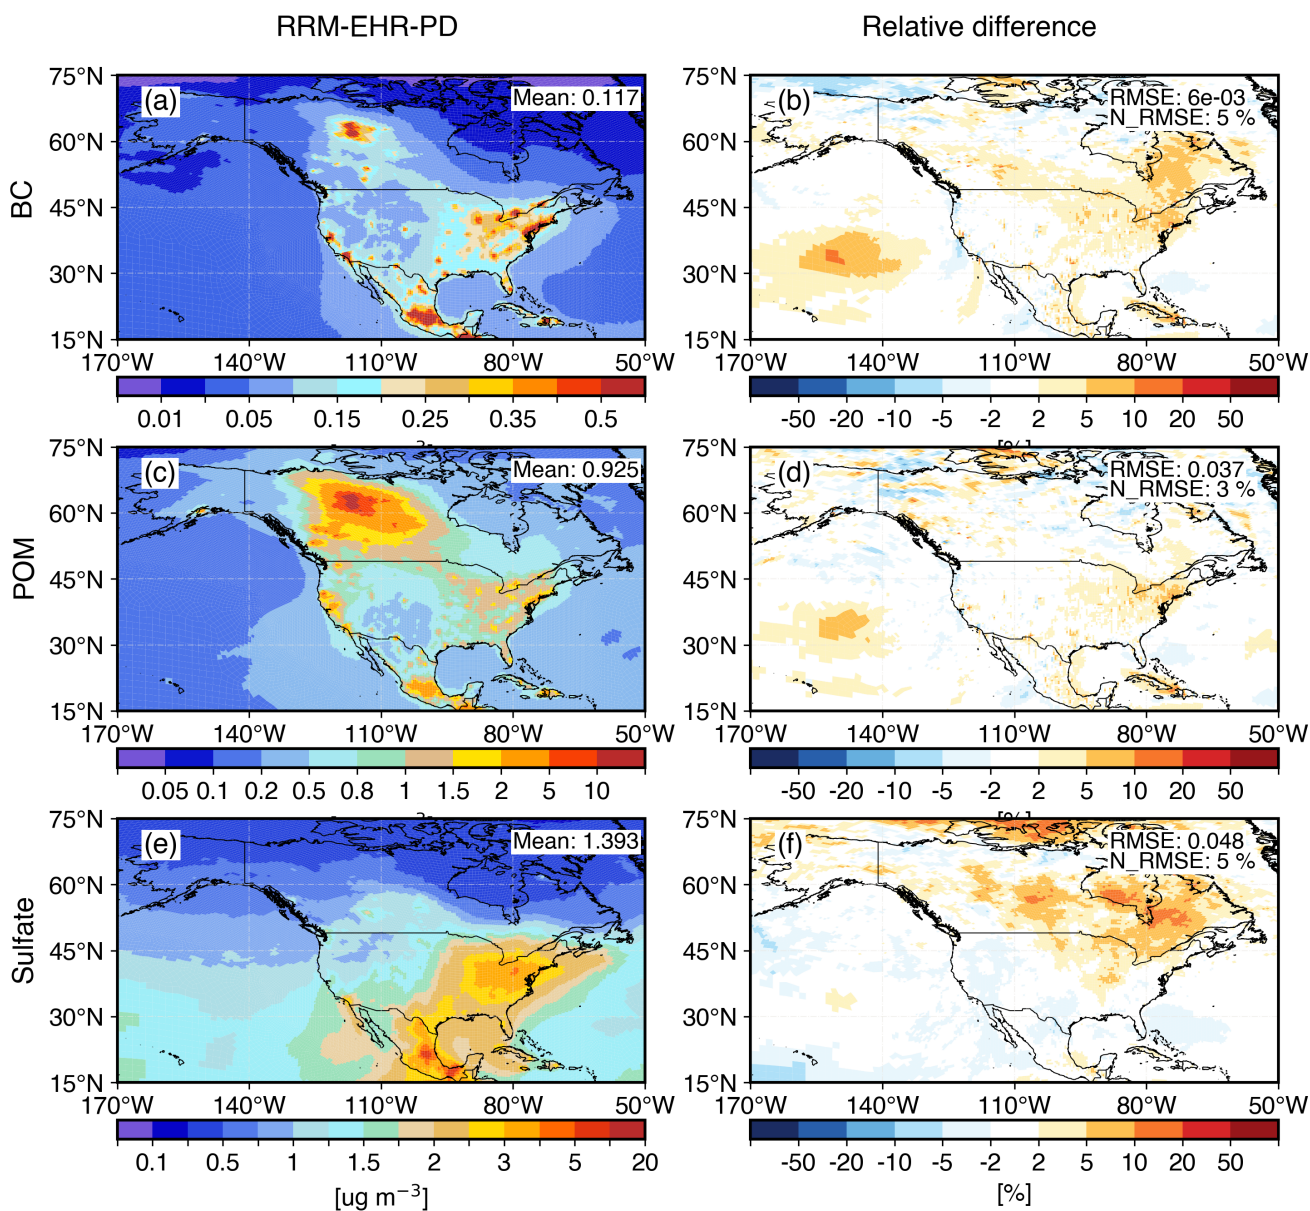

**Figure S5.** Simulated spatial distribution of annual mean aerosol surface concentration from RRM-EHR-PD (left column) and the relative difference between RRM-SE-PD and RRM-EHR-PD (right column) over North America. Distributions are shown for (a, b) Black Carbon (BC), (c, d) Primary Organic Matter (POM), and (e, f) Sulfate aerosols. The relative difference for field X is calculated as:  $(\frac{X_{def} - X_{se}}{X_{se}}) \times 100\%$ , where “se” and “def” subscripts refer to the simulations with new and default emission treatment respectively. Mean, RMSE and normalized RMSE (N\_RMSE) are indicated at the top right corner of the panels. Mean and RMSE has a unit of  $\mu\text{g m}^{-3}$ . N\_RMSE is defined as in Table 2.

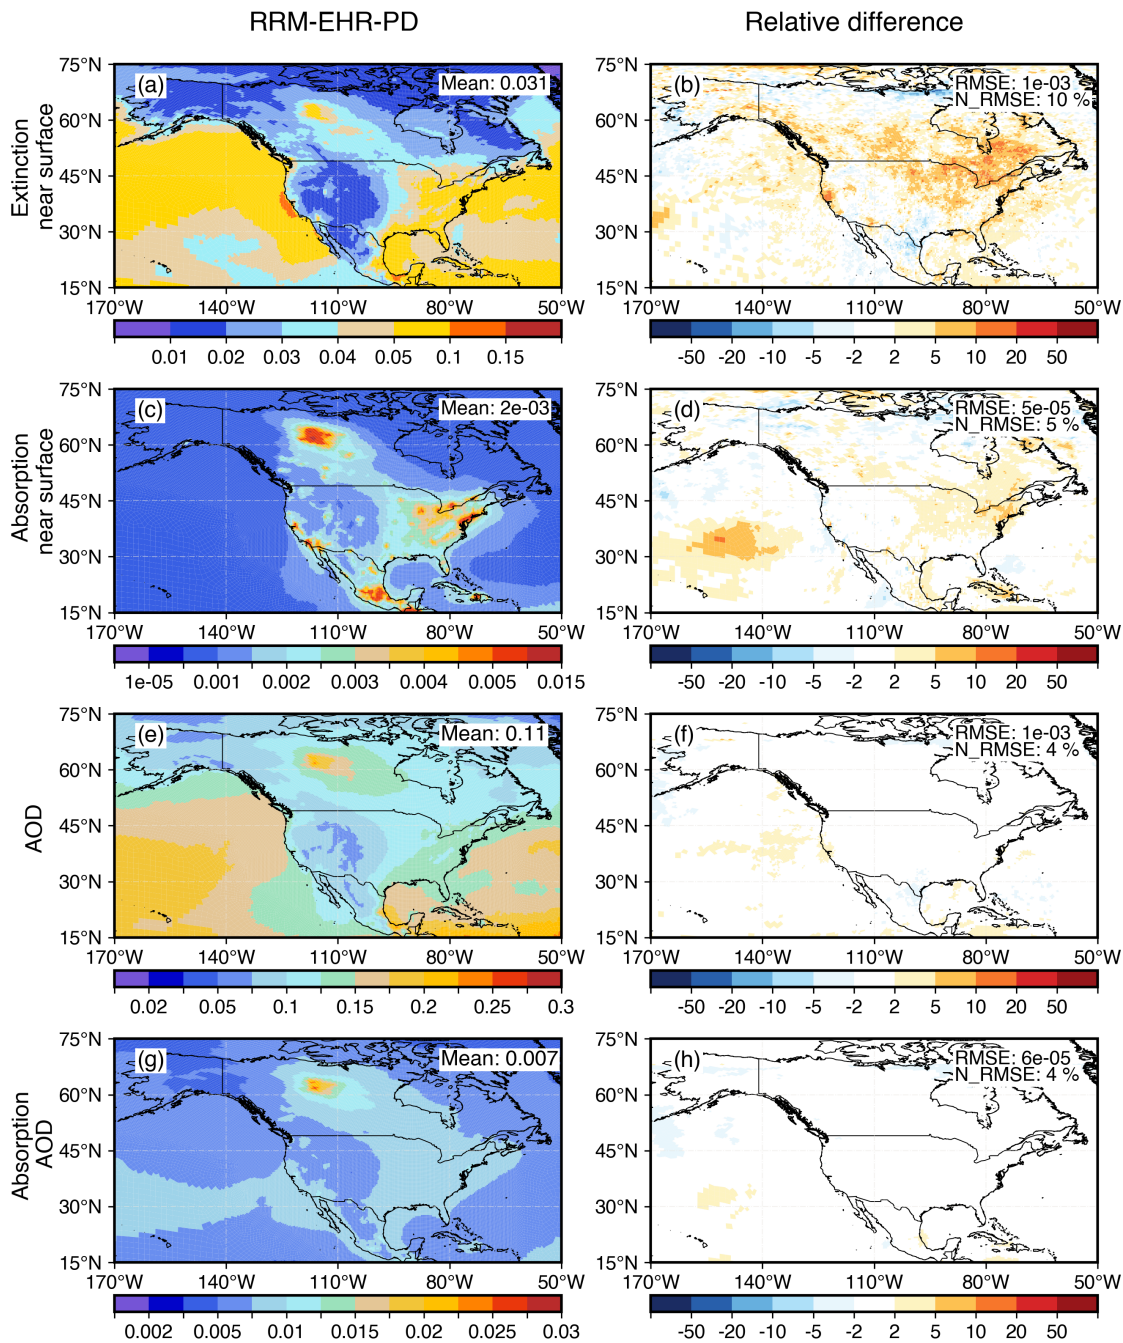

**Figure S6.** Spatial distribution of annual mean simulated (a, b) aerosol extinction at surface, (c, d) aerosol absorption at surface, (e, f) Aerosol Optical Depth (AOD), and (g, h) absorbing AOD from RRM-EHR-PD (left column) and the relative difference between RRM-SE-PD and RRM-EHR-PD (right column) over North America. The relative difference for field X is calculated as:  $(\frac{X_{def} - X_{se}}{X_{se}}) \times 100\%$ , where “se” and “def” subscripts refer to the simulations with new and default emission treatment respectively. Mean, RMSE and normalized RMSE (N\_RMSE) are indicated at the top right corner of the panels. Mean and RMSE has a unit of  $\mu g m^{-3}$ . N\_RMSE is defined as in Table 2.

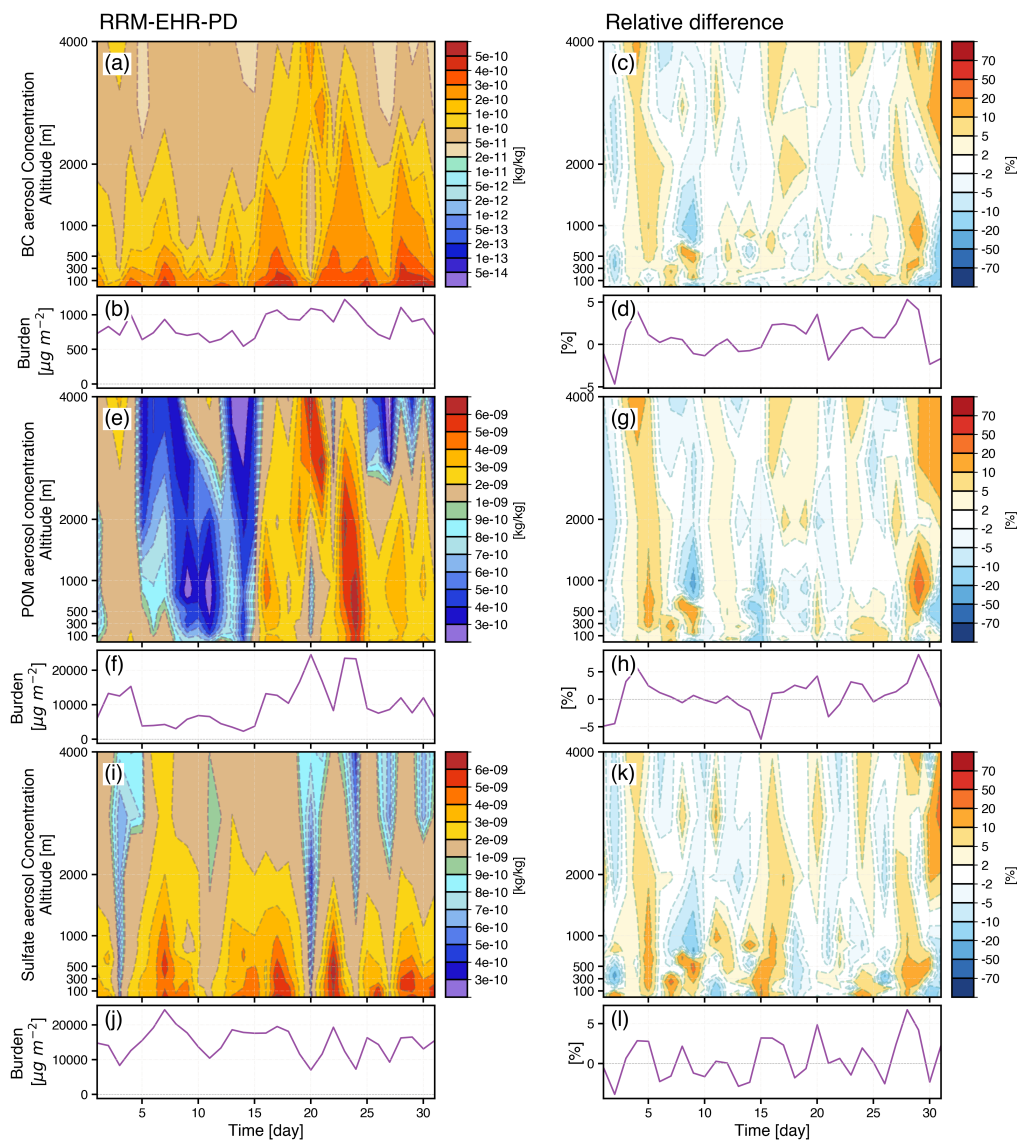

**Figure S7.** Daily mean concentration profile and burden time-series of (a-d) BC, (e-h) POM, and (i-l) Sulfate aerosols. All profiles are shown during the month of July 2016 over highly polluted locations in the eastern United States (42°N and 70°W). Simulated vertical distribution and burden time series from RRM-EHR-PD (left column) and the relative difference between RRM-EHR-PD and RRM-SE-PD (right column) are shown.

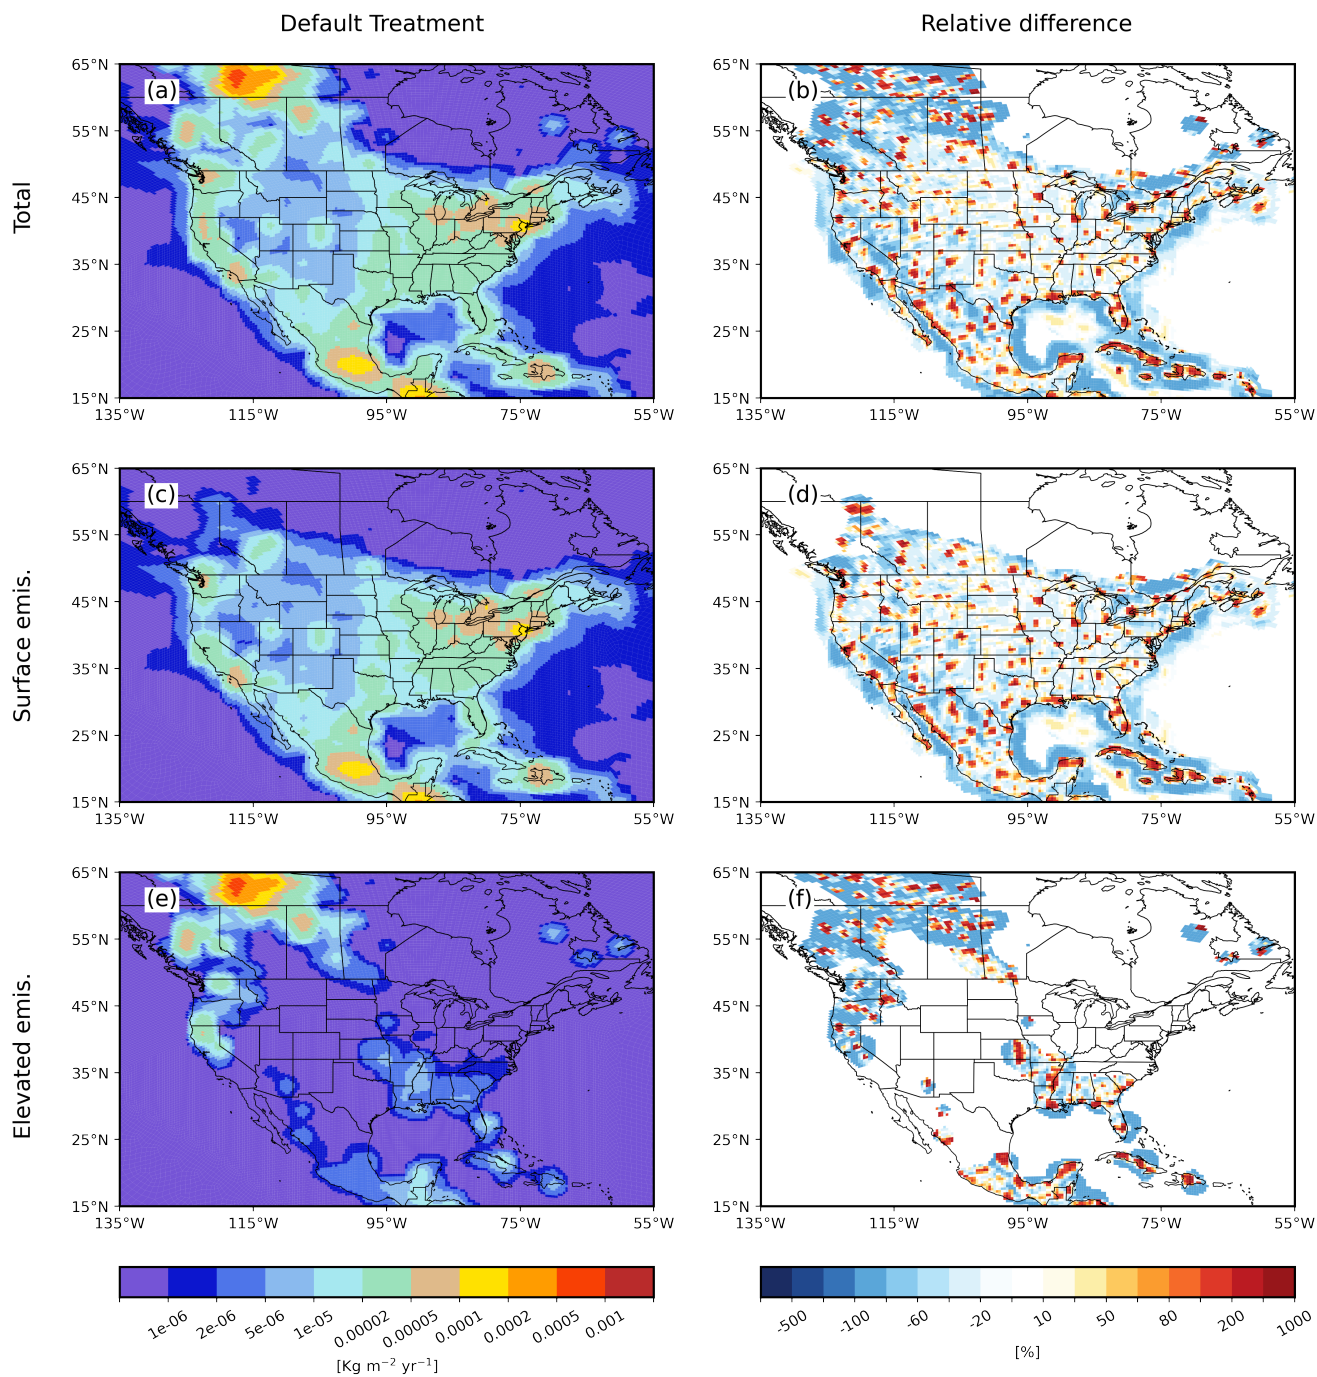

**Figure S8.** Spatial distribution of simulated annual mean source and major contributing components of BC over North America from PD RRM simulations. The distribution from RRM-PD (with default emission treatment) (left column) and the associated relative difference between RRM-SE-PD (with new emission treatment) and RRM-PD (right column) are shown.

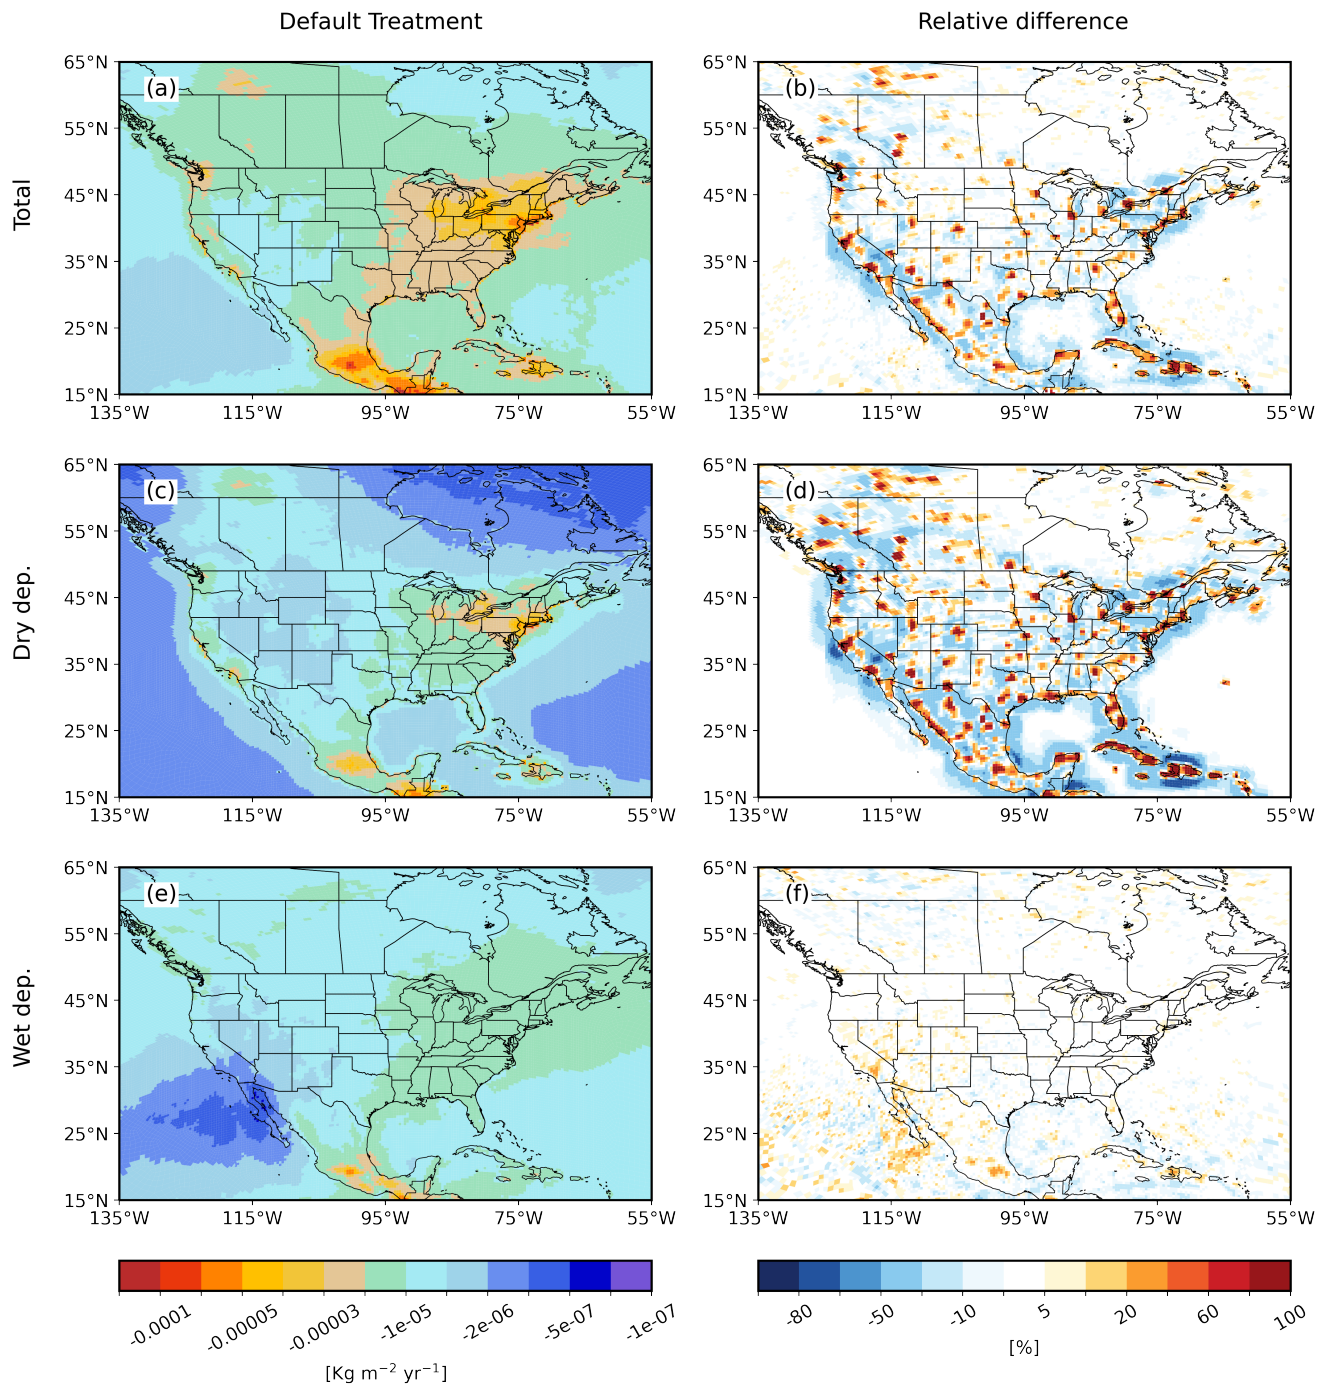

**Figure S9.** Spatial distribution of simulated annual mean sinks and major contributing components of BC over North America from PD RRM simulations. The distribution from RRM-PD (with default emission treatment) (left column) and the associated relative difference between RRM-SE-PD (with new emission treatment) and RRM-PD (right column) are shown.

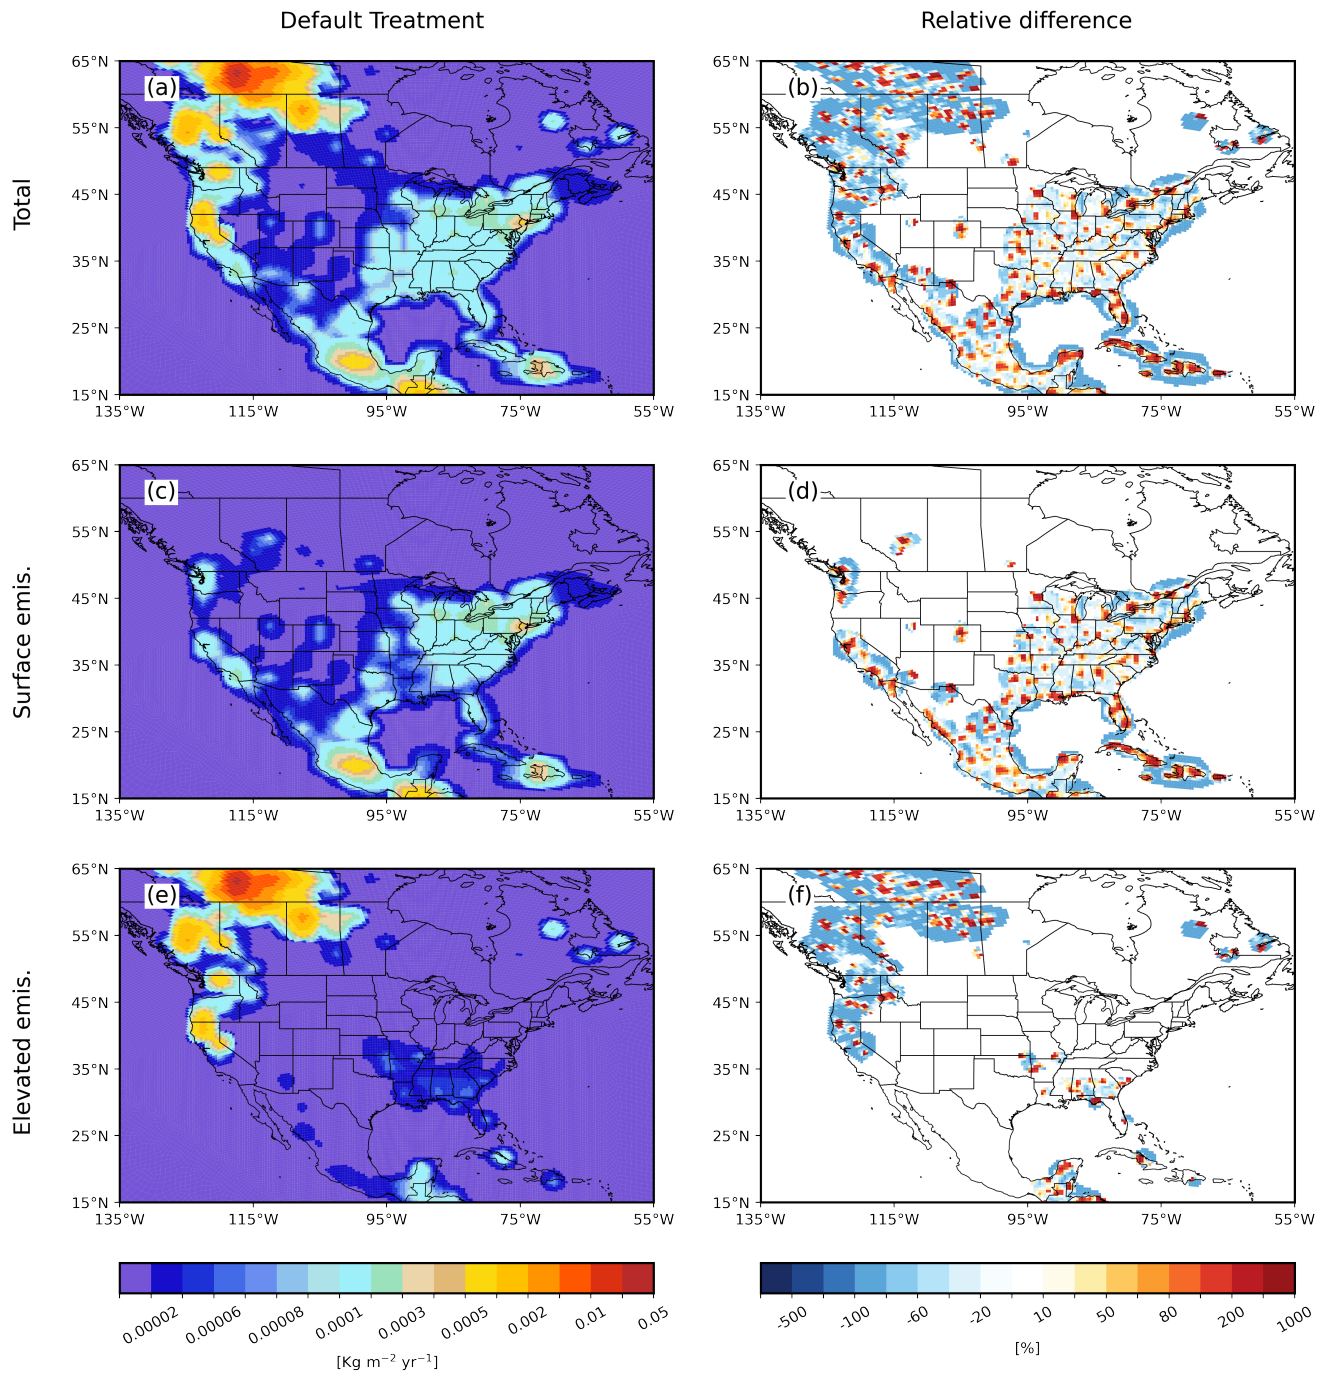

Figure S10. Same as Fig. S8, except for POM.

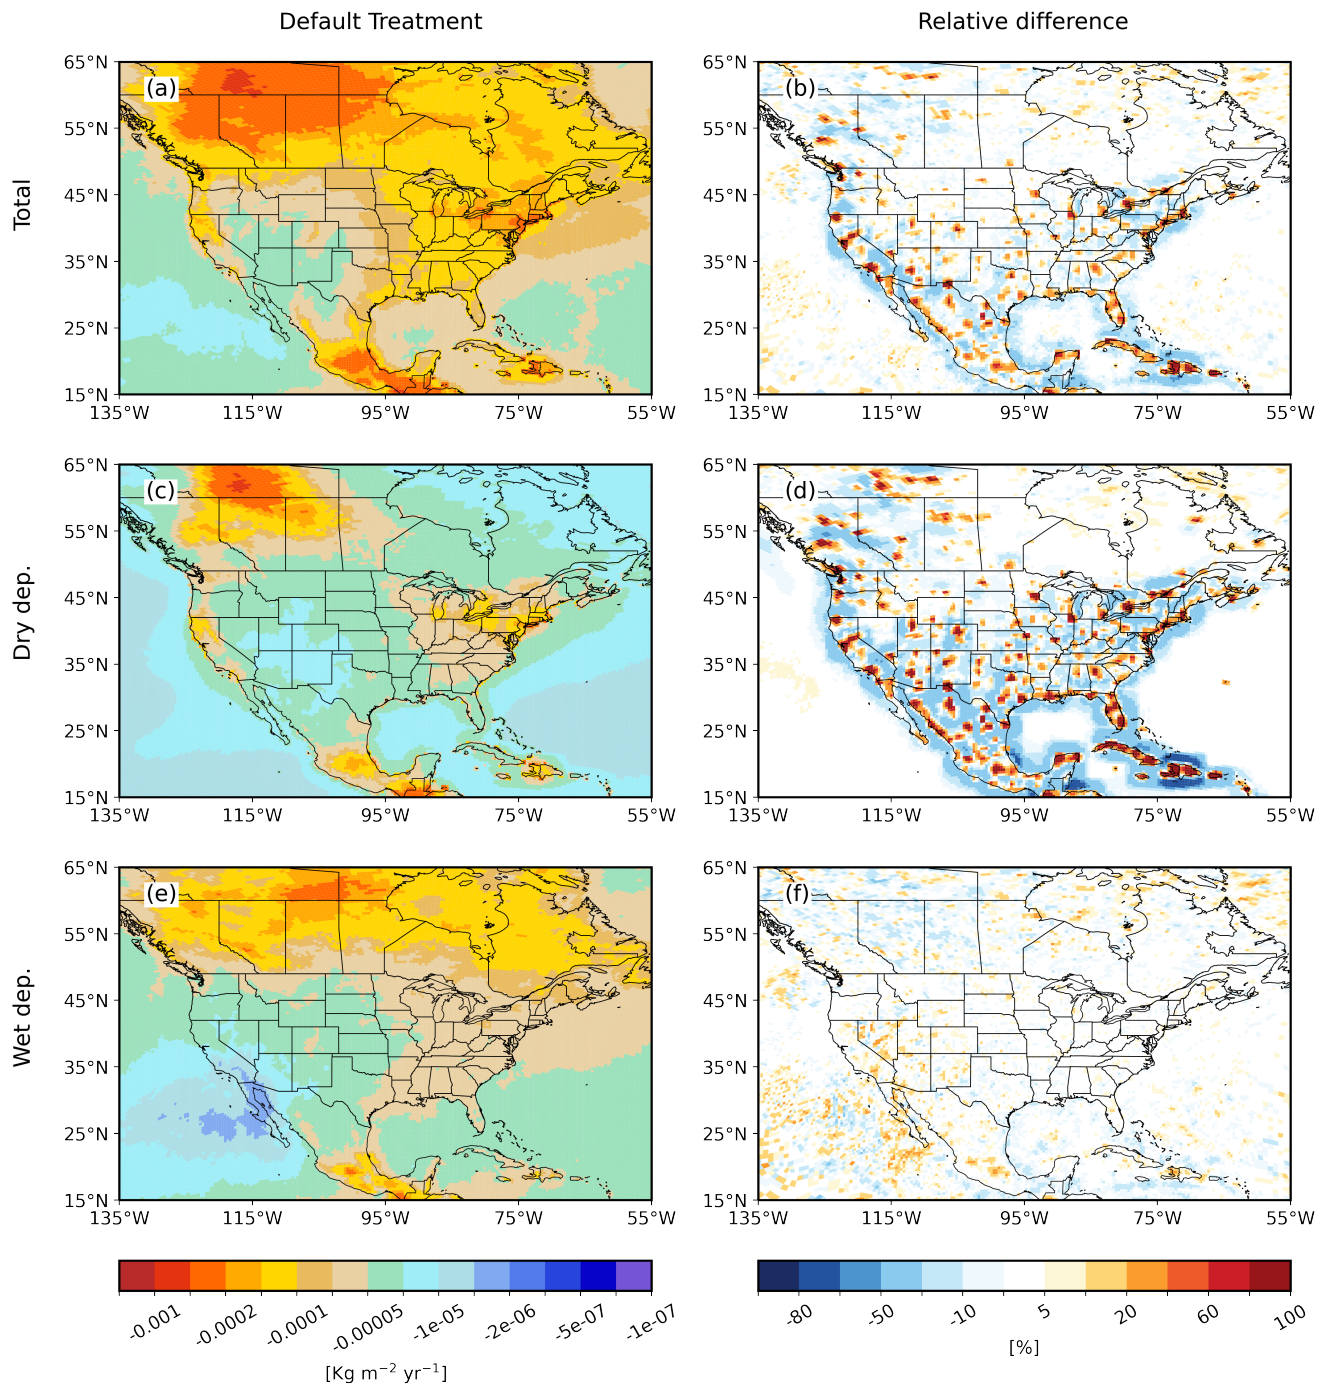

**Figure S11.** Same as Fig. S9, except for POM.



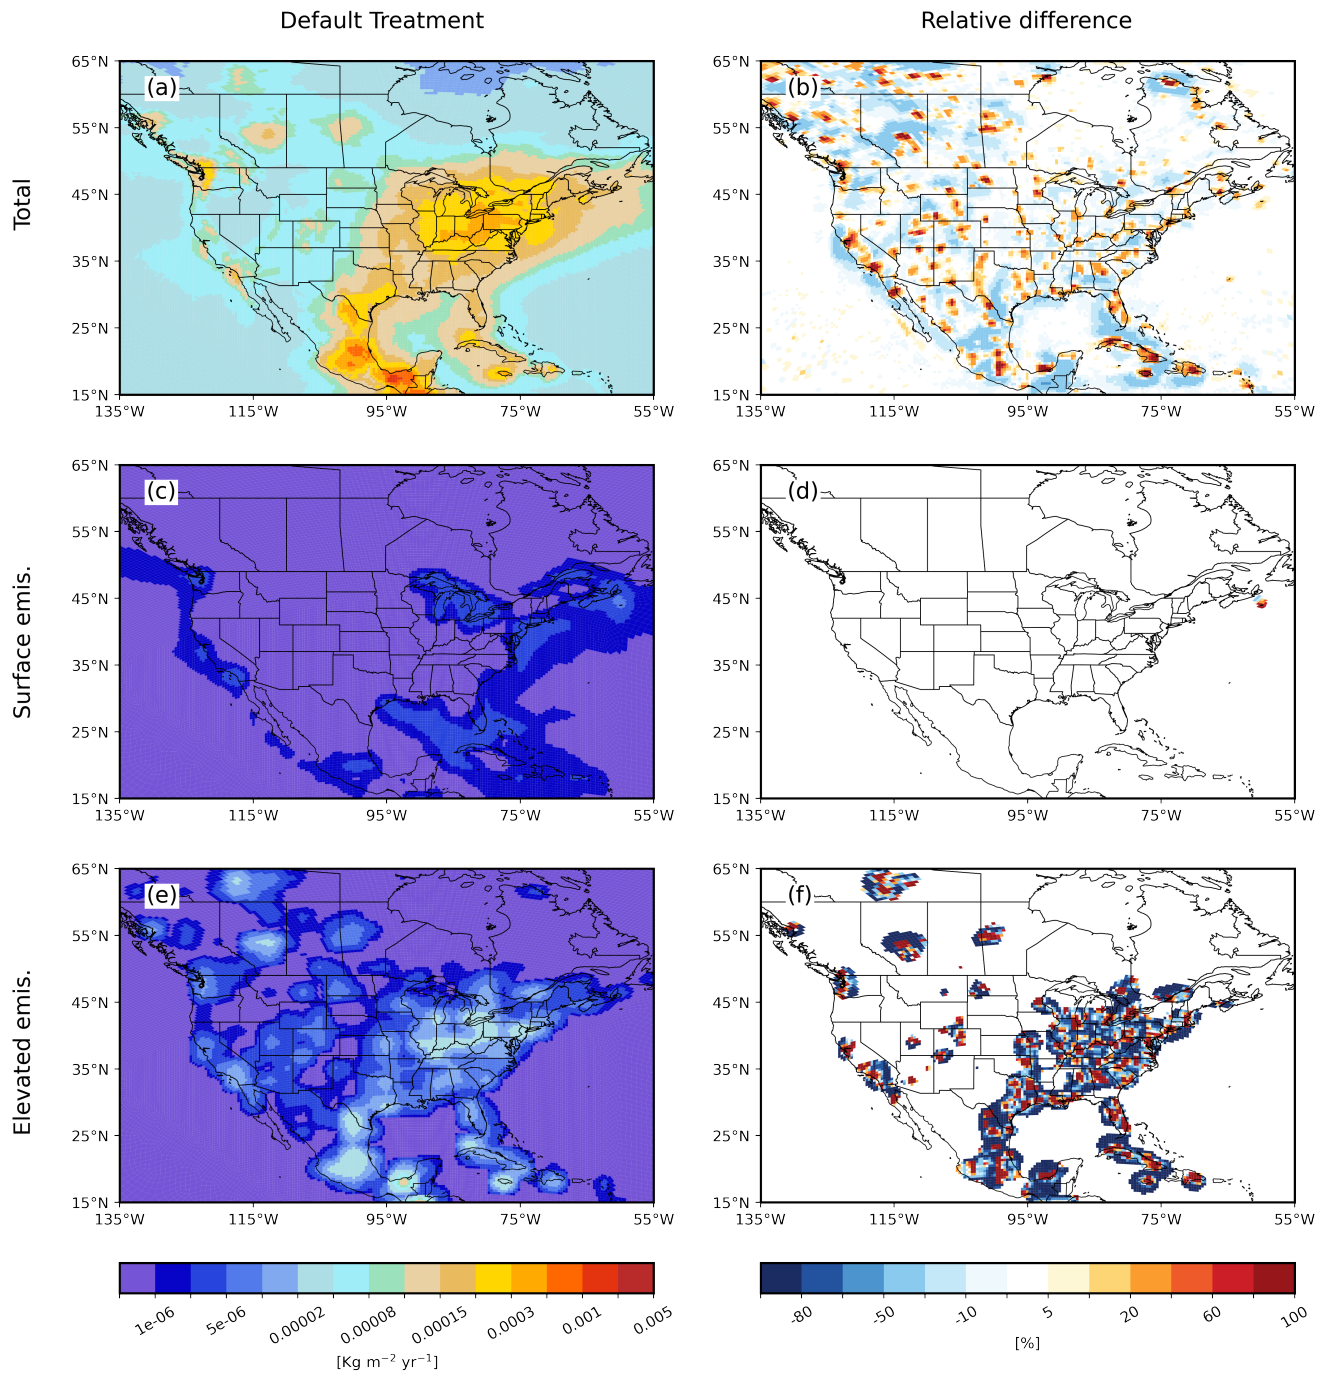

Figure S12. Same as Fig. S8, except for Sulfate.

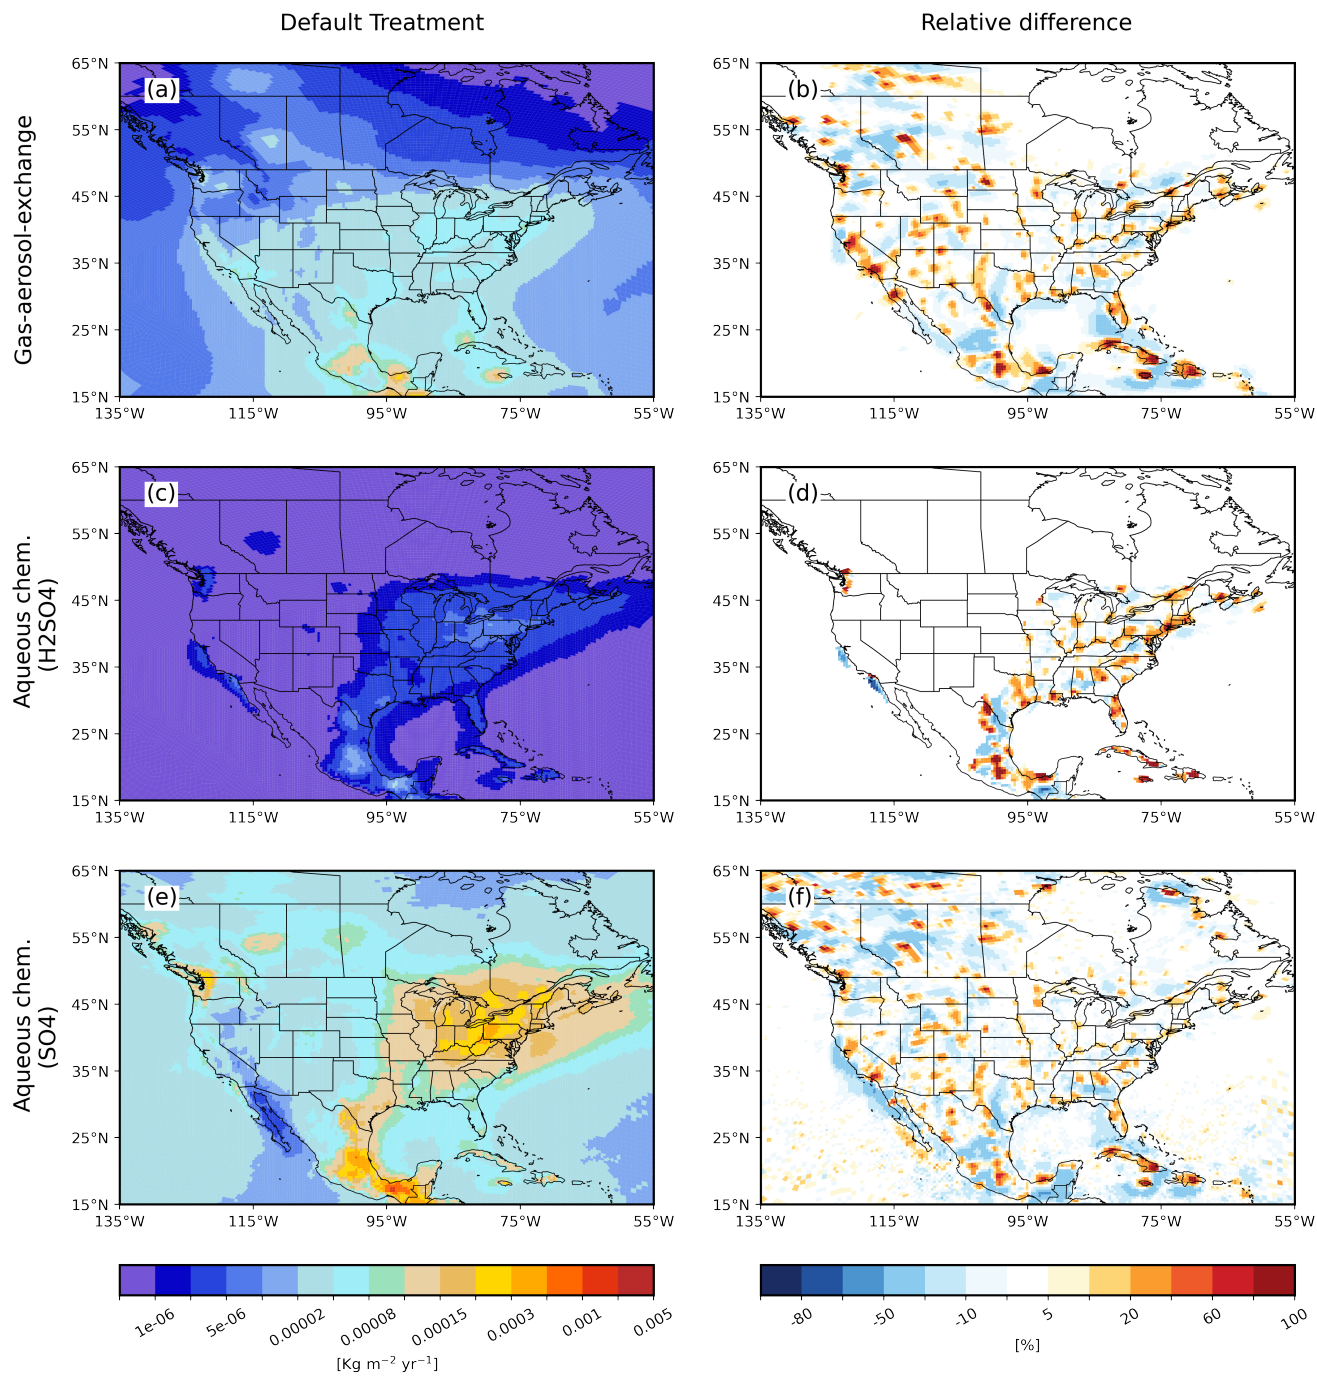

Figure S13. Same as Fig. S8, except for sulfate components.

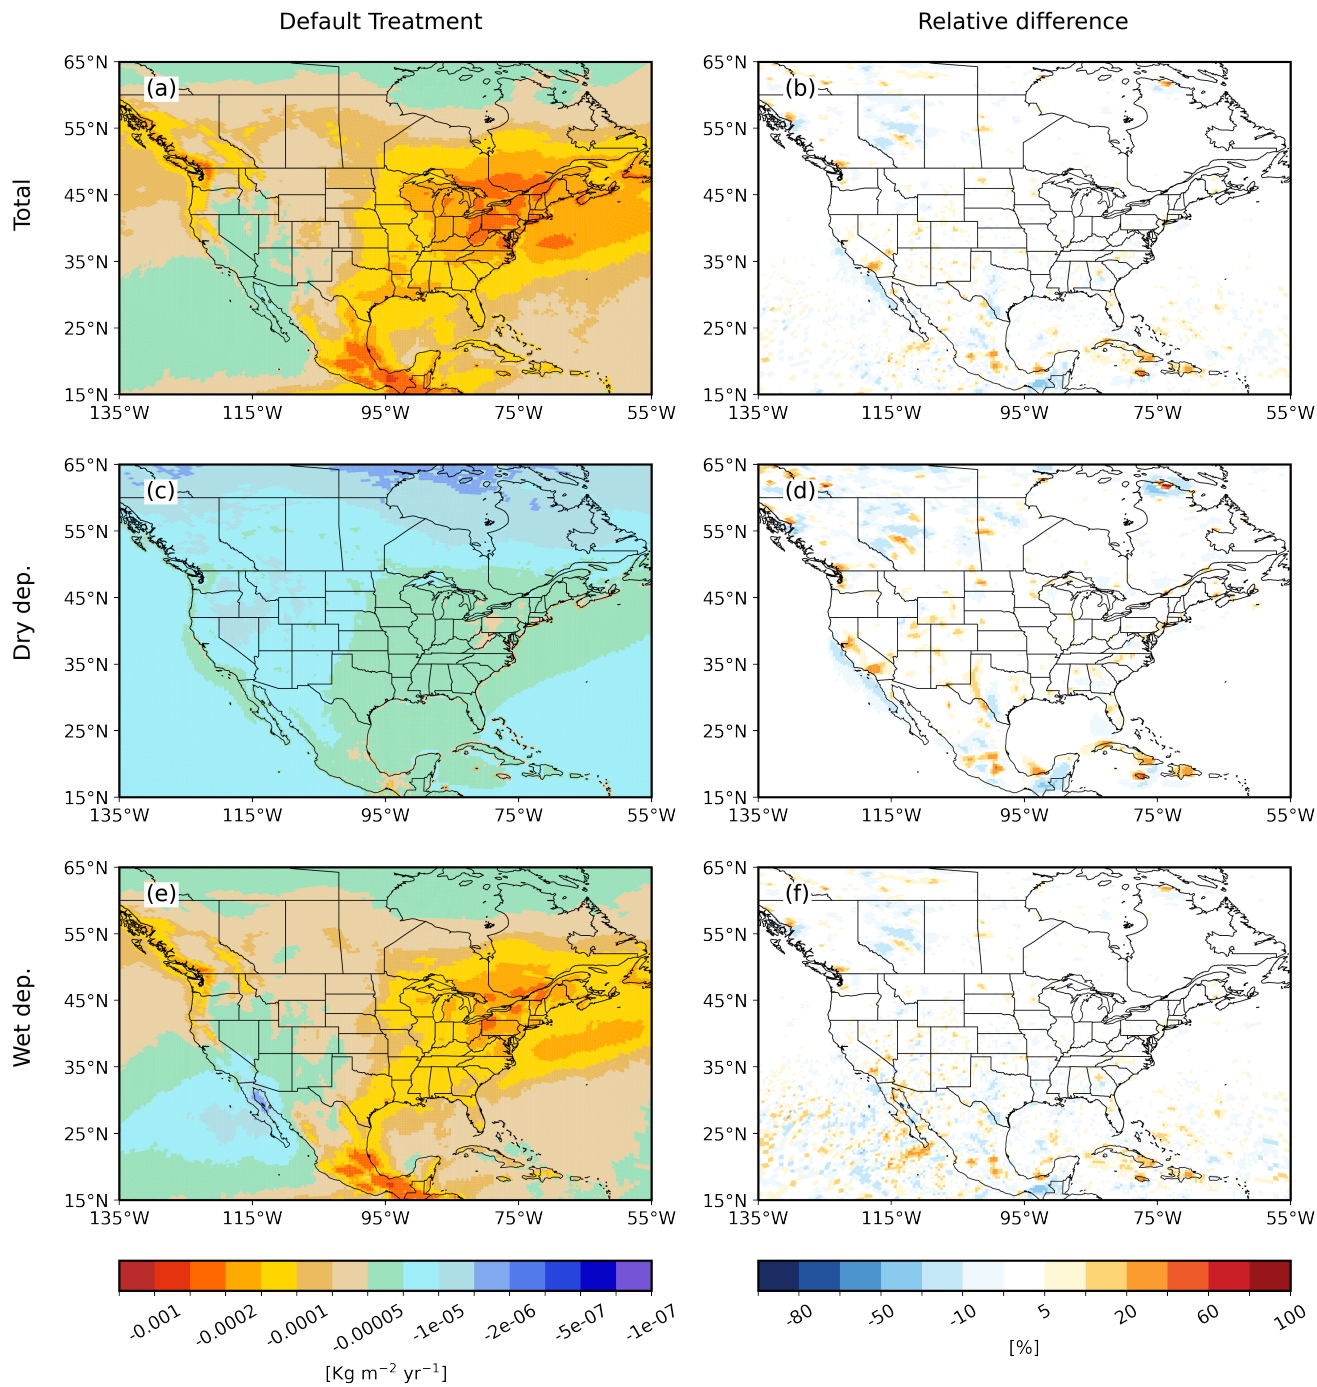

**Figure S14.** Same as Fig. S9, except for Sulfate.

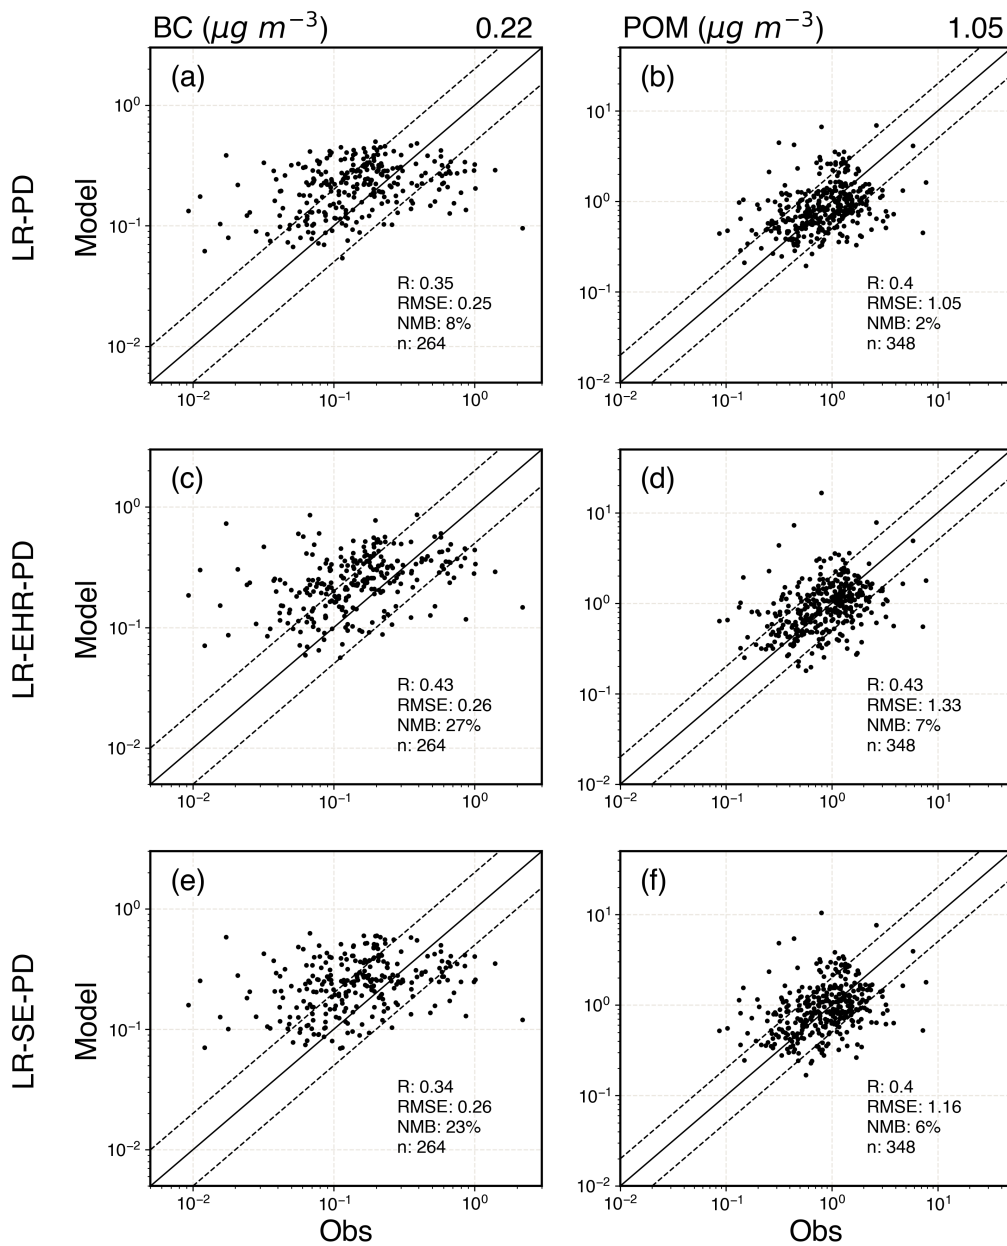

**Figure S15.** Scatter plots between simulated and observed monthly mean surface concentrations of (a, c) Black Carbon (BC) and (b, d) Primary Organic Matter (POM). Observations of the surface concentrations are from IMPROVE for the simulation year of 2016. Scatter plot statistics compare the spearman's correlation (R), number of data points (n), RMSE, NMB values between (a, b) LR-PD, (c, d) LR-EHR-PD, and (e, f) LR-SE-PD simulation. RMSE and NMB are defined as in Table 2. Solid lines indicate the 1:1 ratio, and the dashed lines indicate the 1:2 and 2:1 ratio. The values at the top of each column indicate the observed mean.

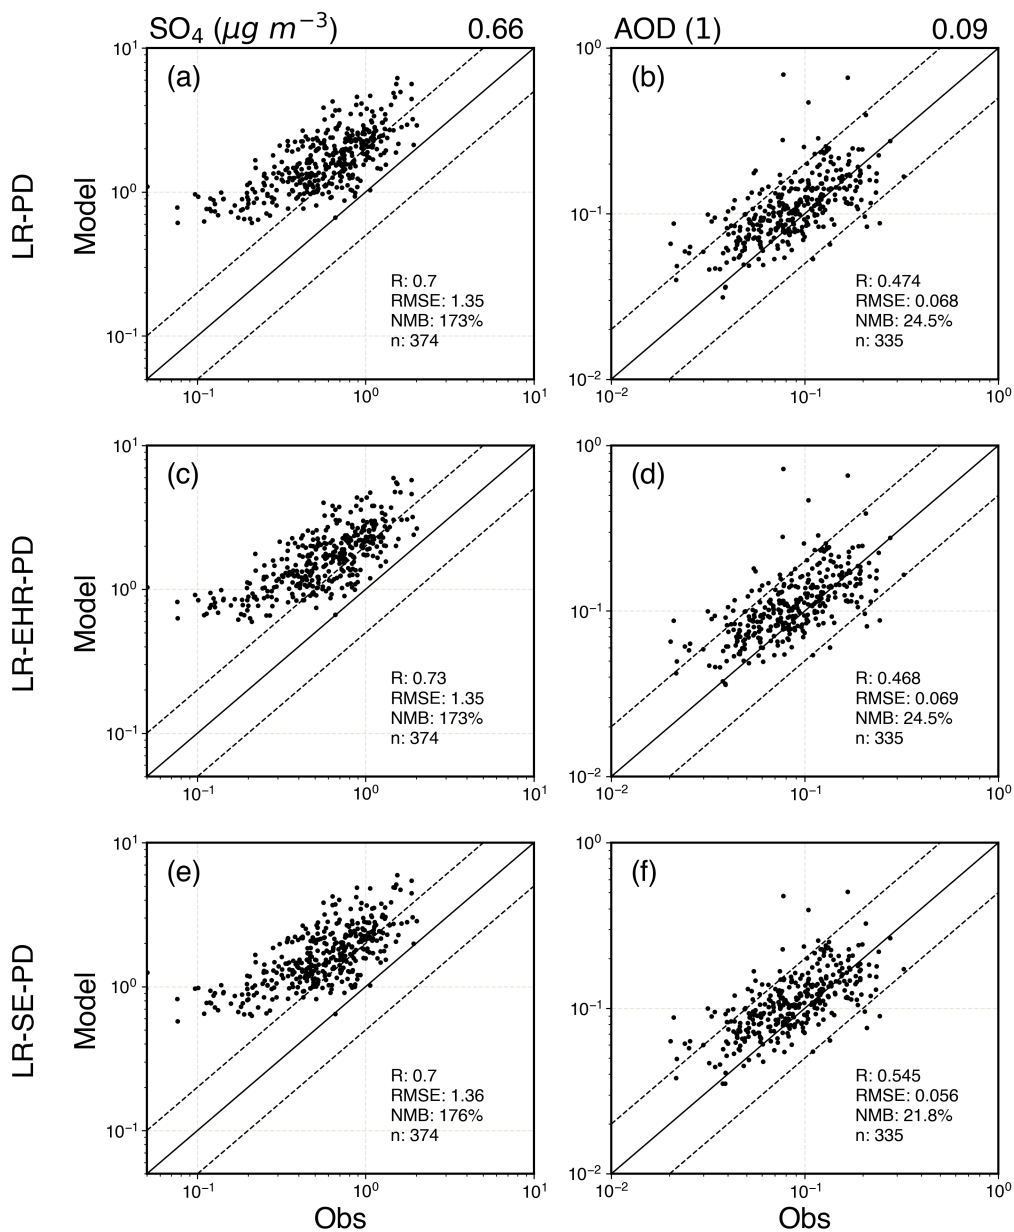

**Figure S16.** Scatter plots between simulated and observed monthly mean surface concentrations of (a, c) sulfate ( $\text{SO}_4$ ) aerosols and (b, d) Aerosol Optical Depth (AOD) at 550 nm. Observations of the surface concentrations and AOD are from IMPROVE and AERONET respectively for the simulation year of 2016. Scatter plot statistics compare the spearman's correlation (R), number of data points (n), RMSE, NMB values between (a, b) LR-PD, (c, d) LR-EHR-PD, and (e, f) LR-SE-PD simulation. RMSE and NMB are defined as in Table 2. Solid lines indicate the 1:1 ratio, and the dashed lines indicate the 1:2 and 2:1 ratio. The values at the top of each column indicate the observed mean.

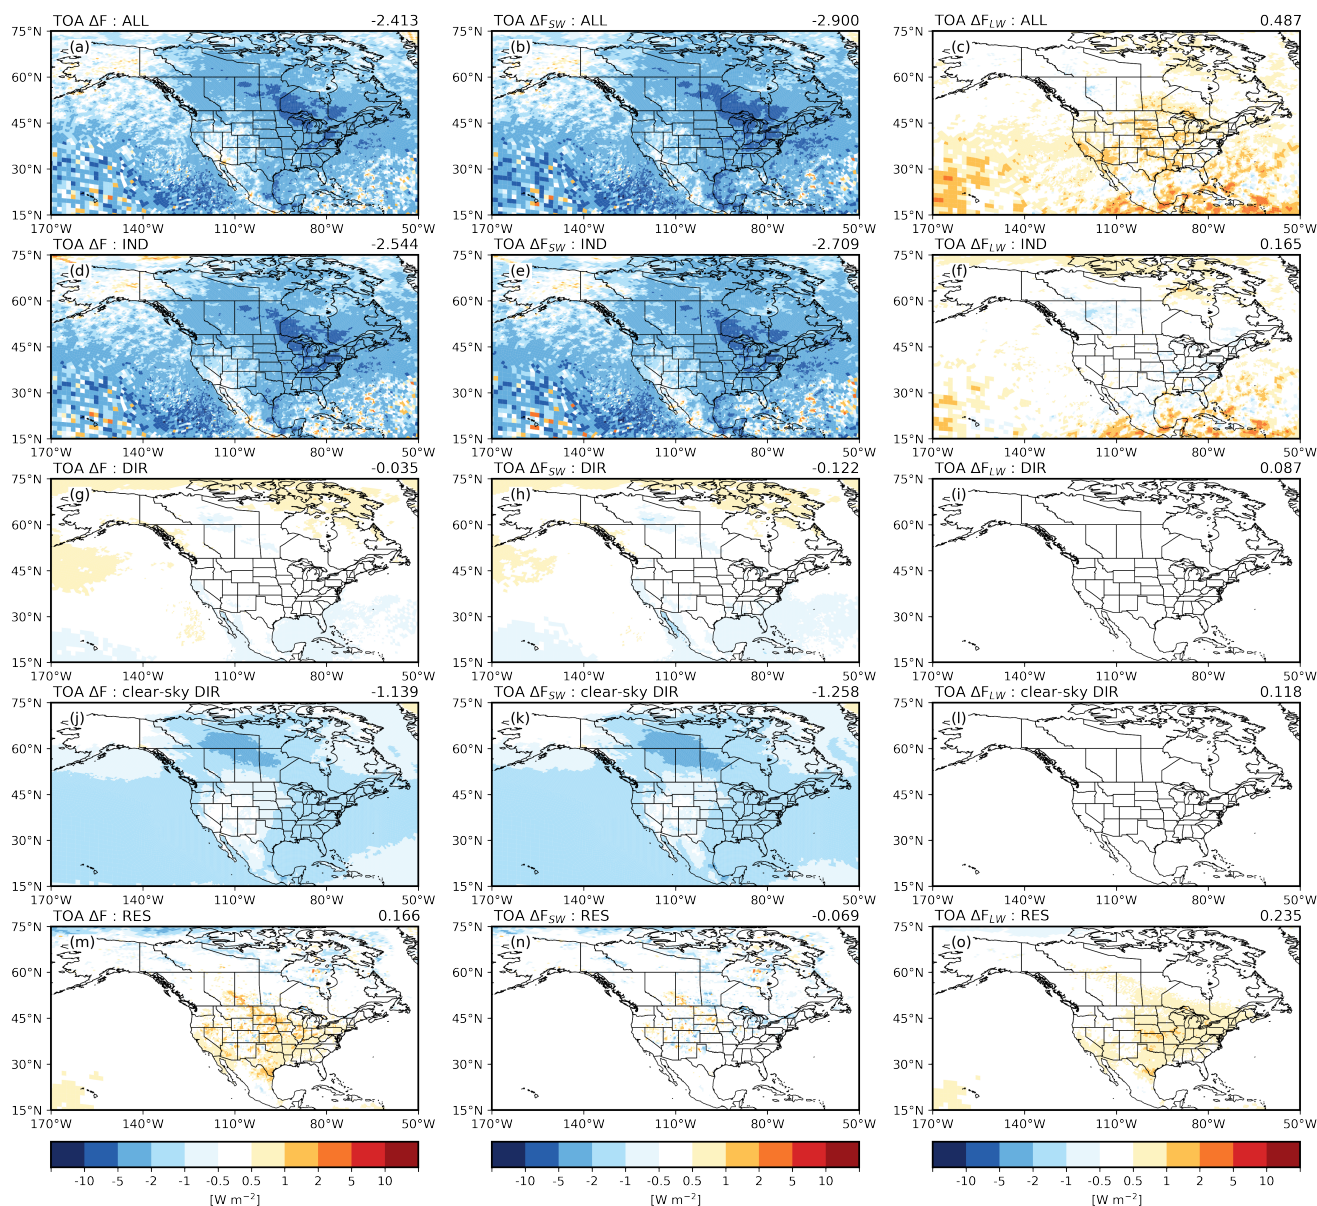

**Figure S17.** Spatial distribution of anthropogenic aerosol radiative forcing ( $\Delta F$ ) over North America at the top of atmosphere (TOA) from the simulations using the default emission treatment. Decomposed net (left column), shortwave (middle column), and longwave (right column)  $\Delta F$  are calculated over North America (NA). ALL indicates the total  $\Delta F$  calculated from PD (2014) - PI (1850) simulations. ACI refers to  $\Delta F$  from aerosol-cloud interactions. “SW” and “LW” subscripts indicate shortwave and longwave  $\Delta F$ . Spatial annual mean over NA are indicated at the top right corner of the panels.

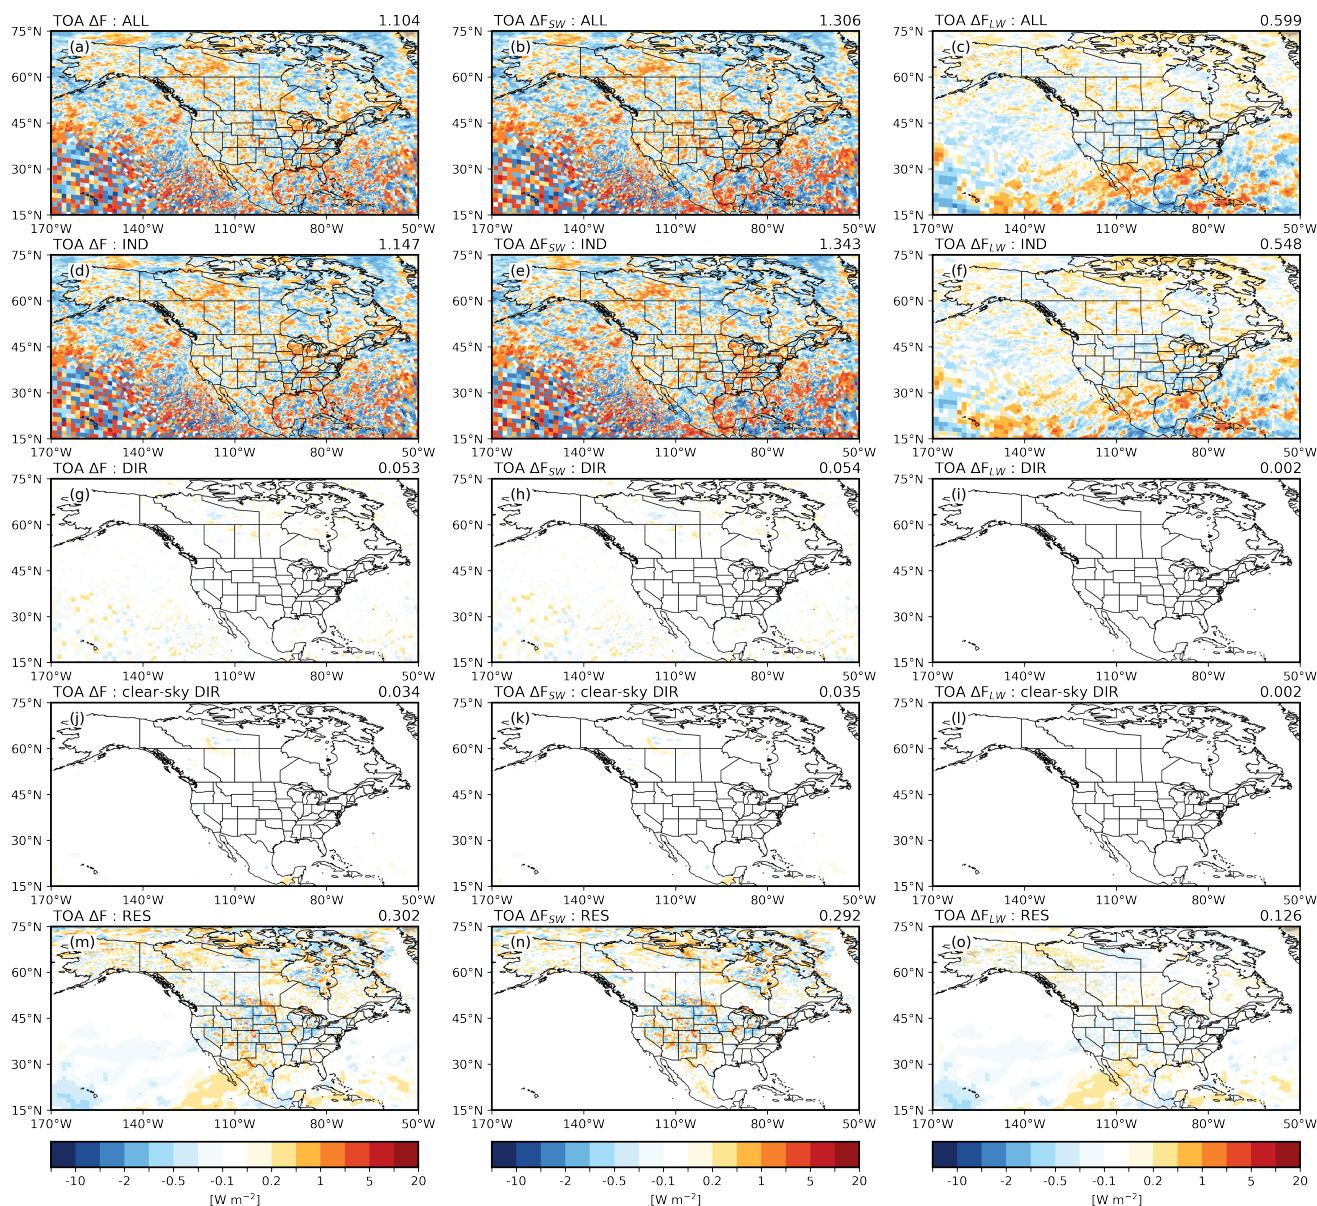

**Figure S18.** Spatial distribution of anthropogenic aerosol radiative forcing ( $\Delta F$ ) difference over North America at the top of atmosphere (TOA) between simulations with revised and default treatment. Decomposed net (left column), shortwave (middle column), and longwave (right column)  $\Delta F$  are calculated over North America (NA). ALL indicates the total  $\Delta F$  calculated from PD (2014) - PI (1850) simulations. ACI refers to  $\Delta F$  from aerosol-cloud interactions. “SW” and “LW” subscripts indicate shortwave and longwave  $\Delta F$ . RMSE over NA are indicated at the top right corner of the panels.

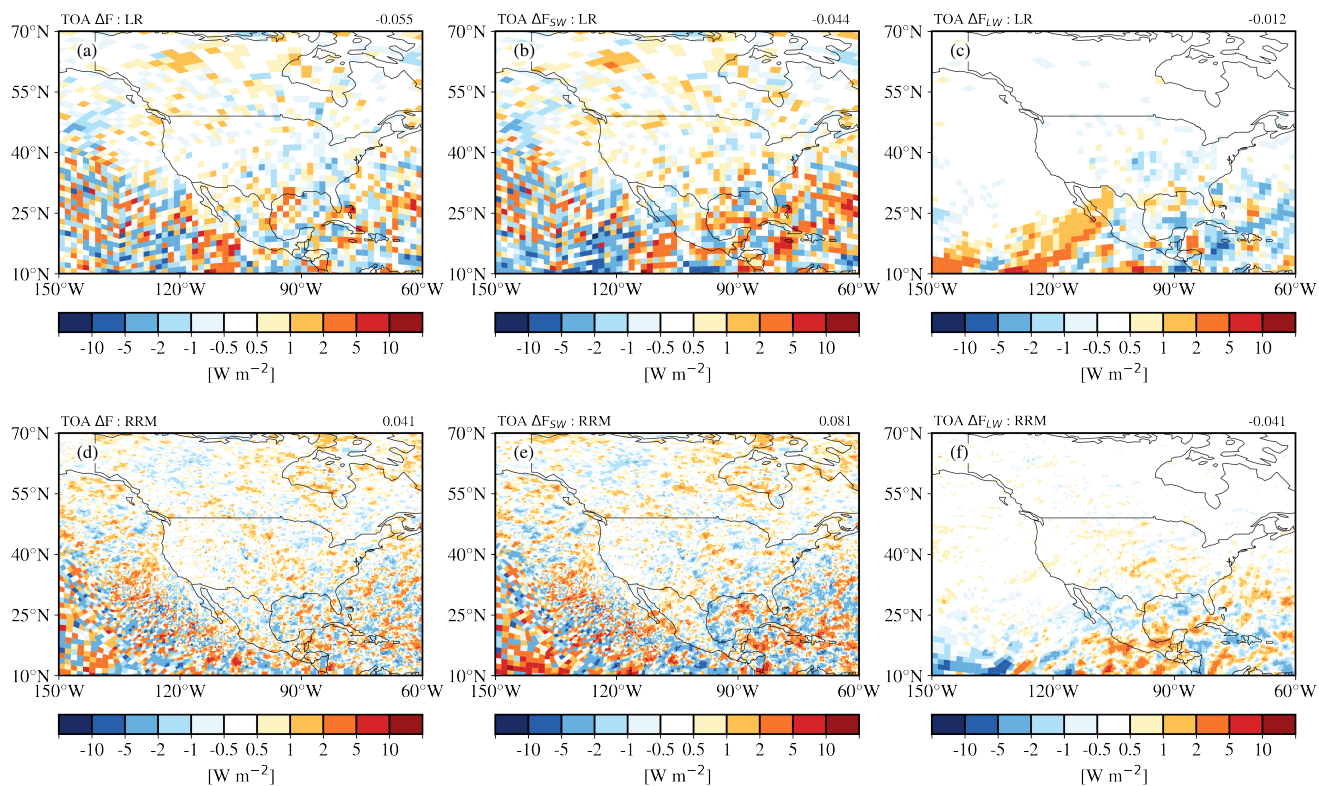

**Figure S19.** Spatial distribution of anthropogenic aerosol radiative forcing differences (net: a,d; shortwave: b,e; and longwave: c,f) at the top of atmosphere (TOA) between simulations with revised and default treatment from (a-c) LR (ne30pg2) and (d-f) RRM simulations. “SW” and “LW” subscripts indicate shortwave and longwave forcing. Area-weighted regional mean differences are indicated at the upper-right corner of each panel.
